# Supplementary material
Source: PubMed Central journal article supplement (PMC7276265)
Supplement: NIHMS1574229-supplement-1.pdf [file NIHMS1574229-supplement-1.pdf]

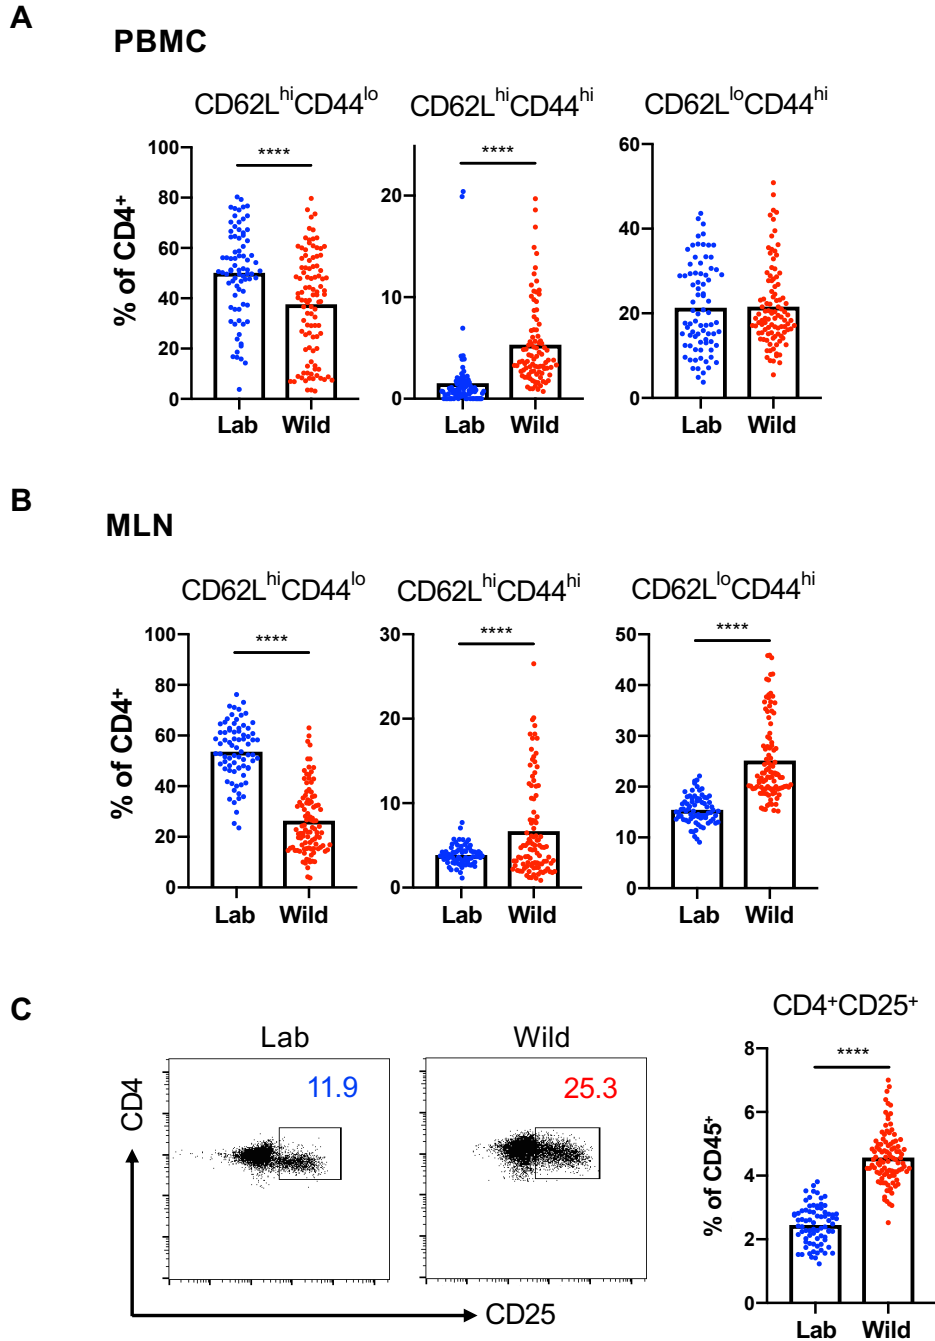

**Figure S1. Rewilding Increases the Proportion of Differentiated CD4<sup>+</sup> T Cell Populations, Related to Figure 1.**

Additional quantification of T cell subsets from rewilded (Wild) mice and control mice maintained in the laboratory condition (Lab) described in Figure 1. **(A-B)** Quantification of CD62L<sup>hi</sup>CD44<sup>lo</sup>, CD62L<sup>hi</sup>CD44<sup>hi</sup>, and CD62L<sup>lo</sup>CD44<sup>hi</sup> CD4<sup>+</sup> T cells in the (A) peripheral blood and (B) MLNs. **(C)** Representative flow cytometry plots and quantification of mesenteric lymph node (MLN) cells expressing CD4<sup>+</sup>CD25<sup>+</sup>. N = 79 lab and 101 wild mice (Blood); N = 77 lab and 101 rewilded mice (MLN). \*\*\*\*  $P < 0.0001$  by two-tailed Student's *t*-test between groups, (A) to (C).



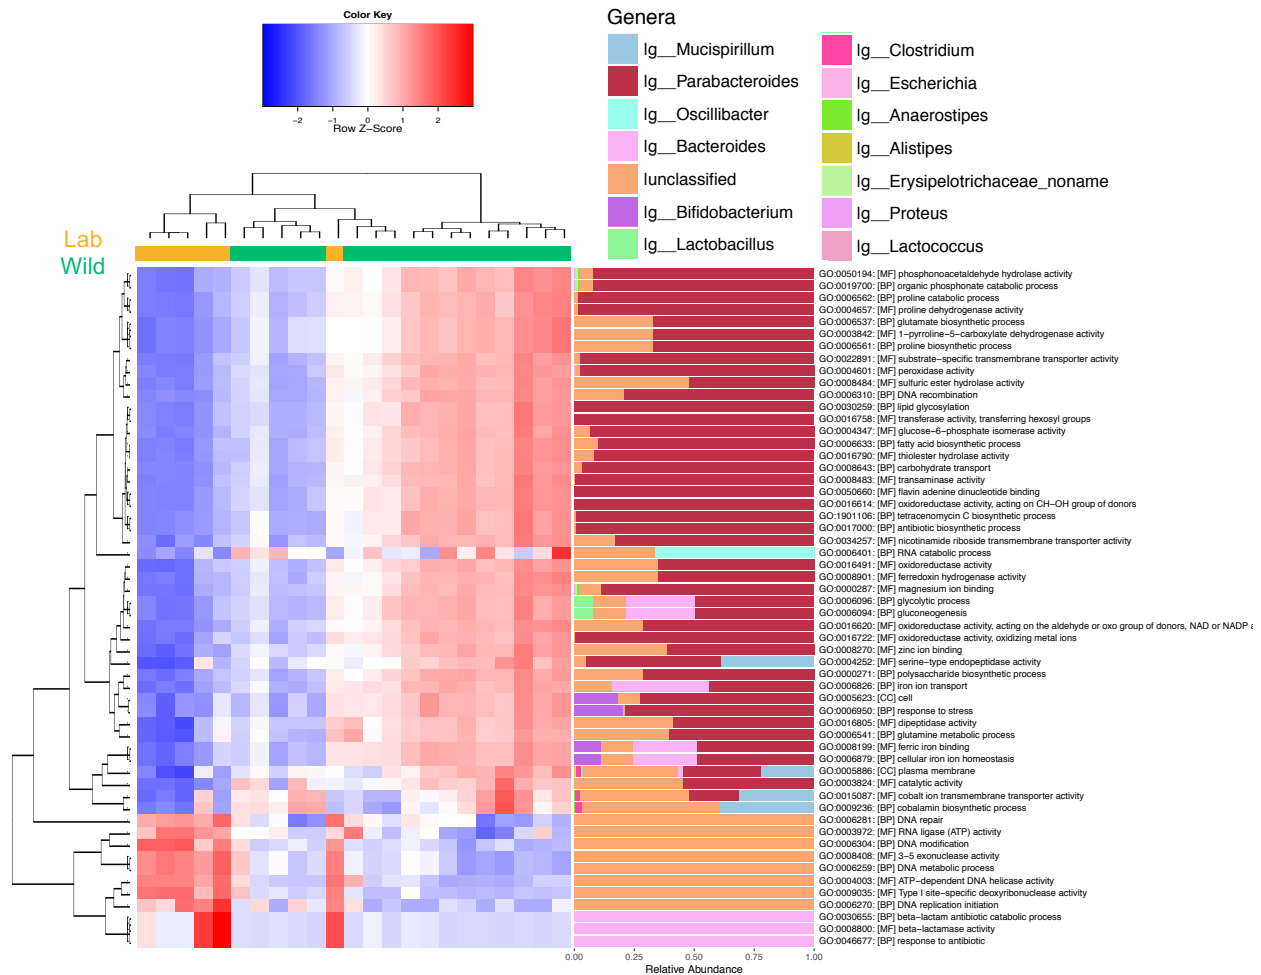

**Figure S3. Rewilded Mice Have Unique Bacterial Gene Family Signatures, Related to Figure 4.**

Differential gene family abundance differences and changes in microbial genera taxa of lab versus rewilded mice. Differentially abundant gene families were evaluated by a fold change difference of 1.8 in either direction and an adjusted p-value of 0.05 from Student's *t*-test between groups. N = 6 lab and 17 rewilded mice.

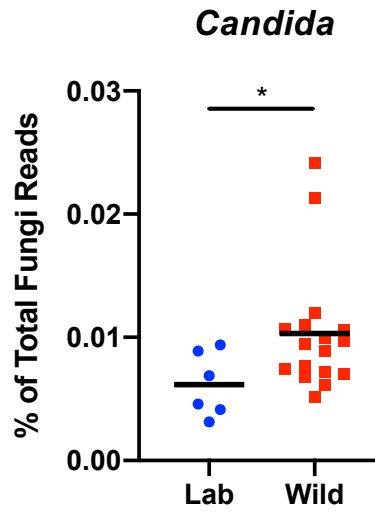

**Figure S4. Rewilded Mice are associated with an Increase in *Candida* Colonization, Related to Figure 4.**

*Candida* genus specific reads identified in the shotgun sequencing. N = 6 lab and 17 rewilded mice. \*  $P < 0.05$  by two-tailed Student's *t*-test between groups.

**A**

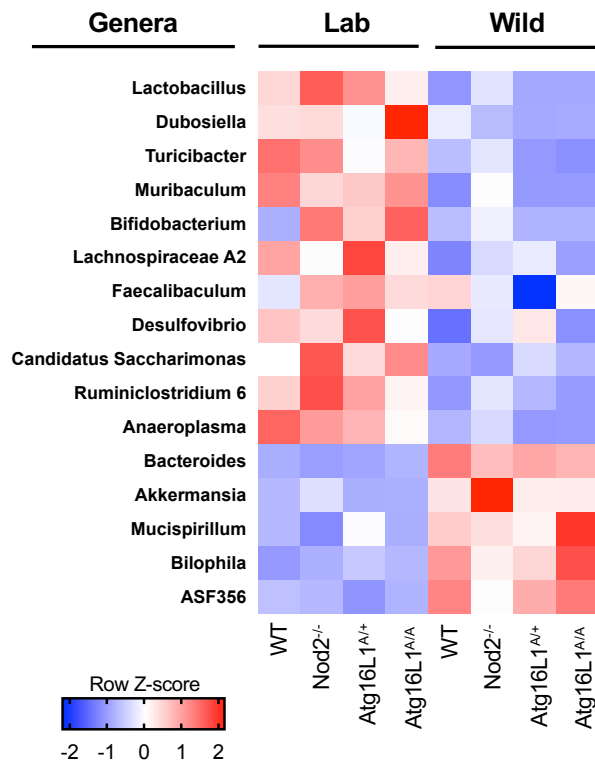

**B**

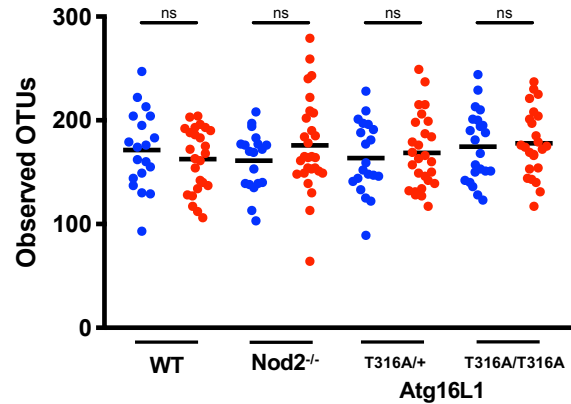

**Figure S5. Bacterial Community Structure of Wildtype, *Atg16l1*, and *Nod2* Mutant Mice in Lab and Wild Conditions, Related to Figure 5.**

**(A)** Heatmap of genera bacterial taxa significantly enriched in wildtype, *Atg16l1*, and *Nod2* mutant mice in lab and wild conditions as determined LefSe analysis (Fig. 4D) **(B)** Alpha diversity quantification through number of OTUs in the above mice. *ns*, not statistically significant

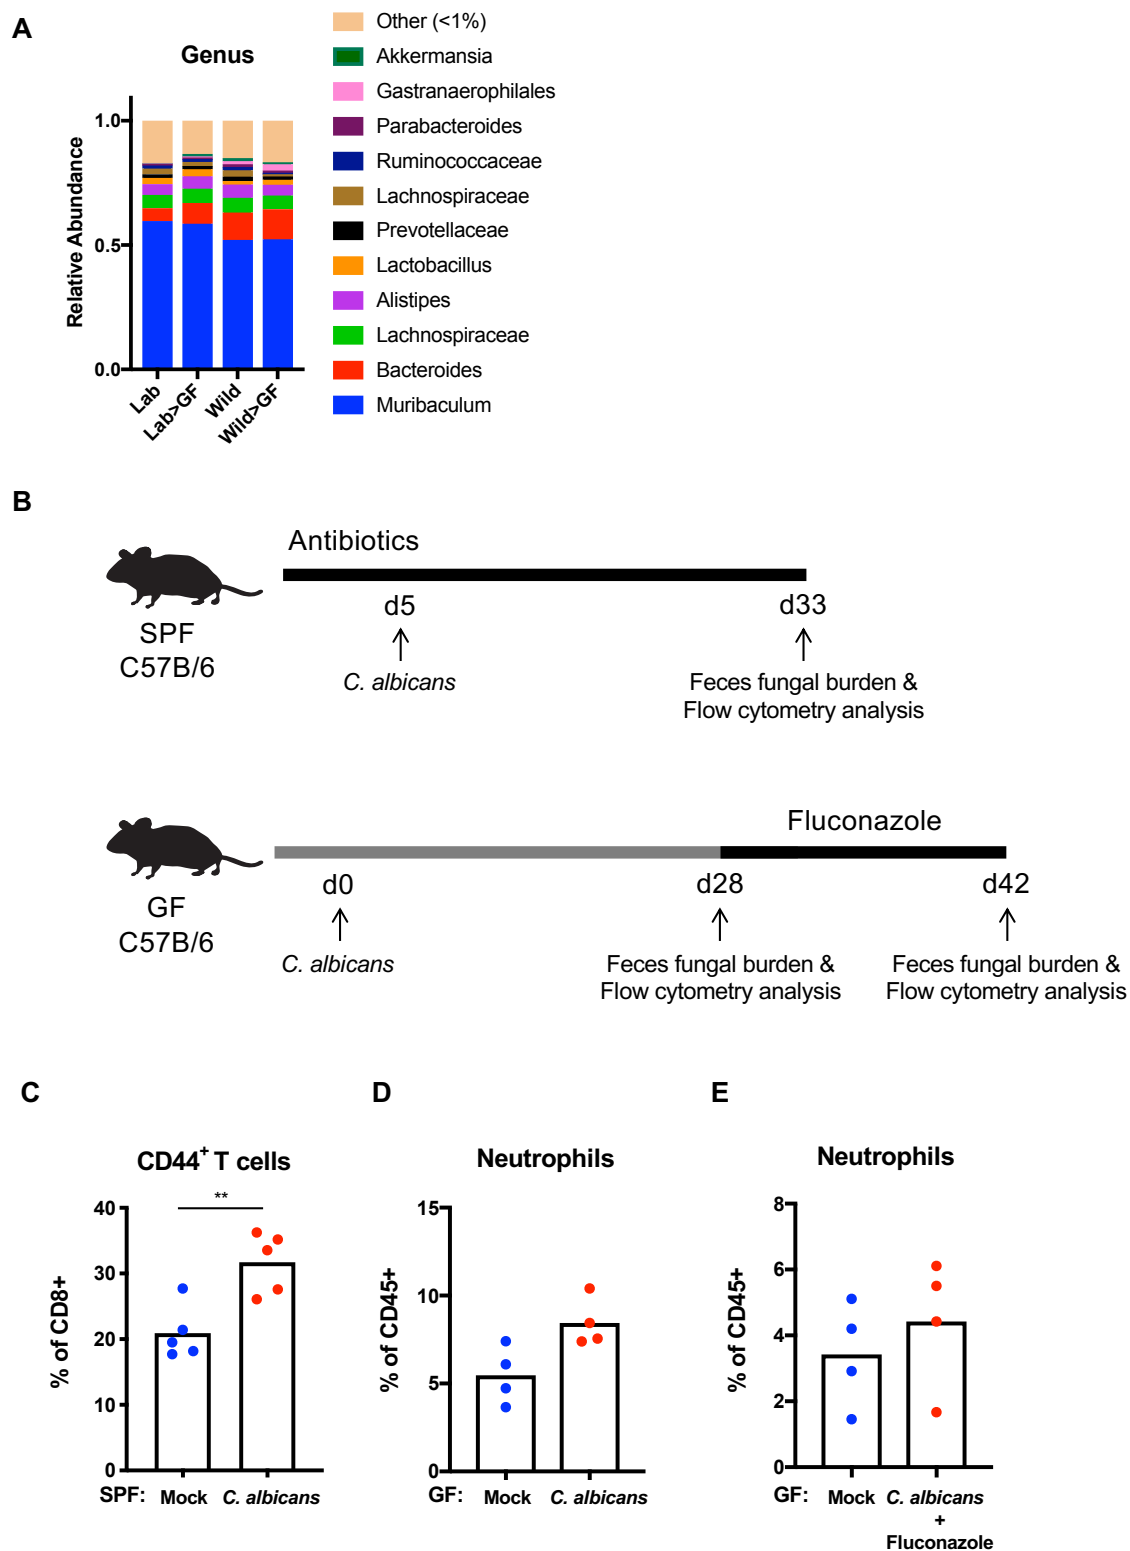

**Figure S6. Bacterial Community Structure of Germ-Free Mice Reconstituted with Microbiota from Lab and Rewilded Mice, Related to Figure 6. Legend continued on next page.**

**(A)** Stacked bar plots displaying the mean relative abundances of genus level taxa within the fecal microbial communities in lab (Lab), rewilded (Wild) mice, or germ-free (GF) mice reconstituted with cecal contents from either lab or rewilded mice. N>5 recipient mice per condition. **(B)** Experimental model of *C. albicans* colonization in SPF and germ-free mice. **(C)** Quantification of CD44<sup>+</sup>CD8<sup>+</sup> T cells in the peripheral blood of *C. albicans* colonized SPF mice. N = 5 mice per group. **(D)** Quantification of CD11b<sup>+</sup>Ly6G<sup>+</sup> neutrophils in the peripheral blood of *C. albicans* mono-associated and control mice. N = 4 mice per group. **(E)** Quantification of neutrophils in the peripheral blood of *C. albicans* mono-associated mice after treatment with antifungal drug (Fluconazole) for 4 weeks. N = 4 mice per condition. \*\*  $P < 0.01$  by two-tailed Student's *t*-test between groups.

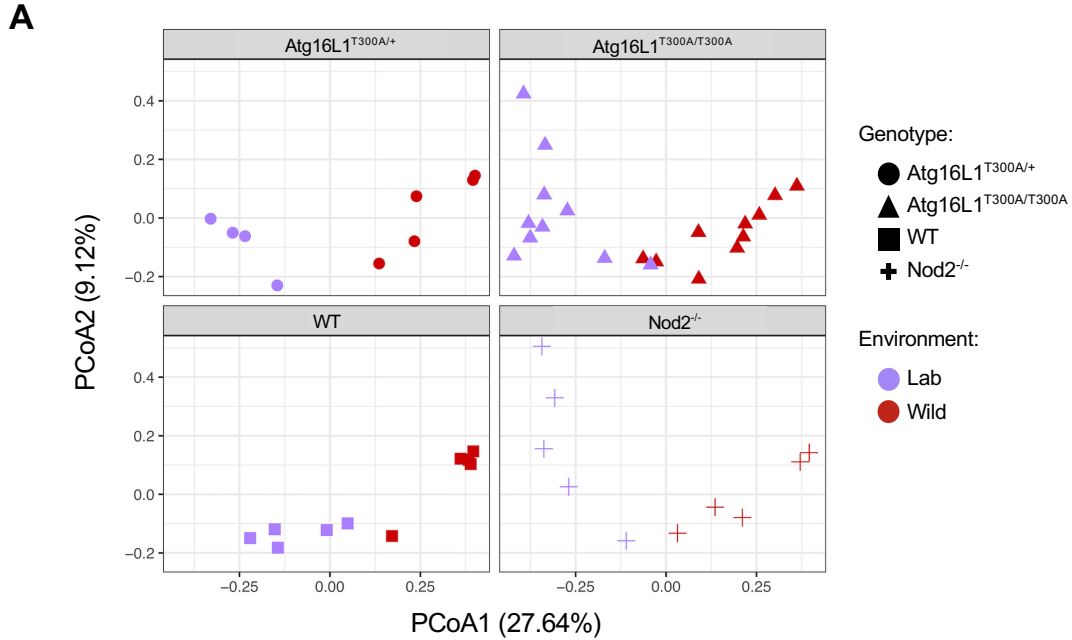

**B**

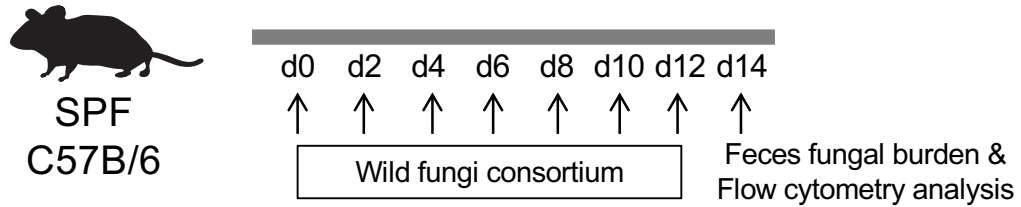

**Figure S7. *Candida albicans* Mono-Colonization Increases Neutrophils in the Peripheral Blood, Related to Figure 7.**

**(A)** PCA of mycobiota ITS sequences in wildtype, *Atg16l1*, and *Nod2* mutant mice in Lab and Wild conditions. **(B)** Experimental model of wild fungi colonization in SPF mice.



| <b>Serology</b>                 | <b>Lab</b> | <b>Wild</b> |
|---------------------------------|------------|-------------|
| MFIA SEND                       | 0/5 (0%)   | 0/5 (0%)    |
| MFIA PVM                        | 0/5 (0%)   | 0/5 (0%)    |
| MFIA MHV                        | 0/5 (0%)   | 0/5 (0%)    |
| MFIA MVM                        | 0/5 (0%)   | 0/5 (0%)    |
| MFIA MPV1                       | 0/5 (0%)   | 0/5 (0%)    |
| MFIA MPV2                       | 0/5 (0%)   | 0/5 (0%)    |
| MFIA NS1                        | 0/5 (0%)   | 0/5 (0%)    |
| MFIA MNV                        | 0/5 (0%)   | 0/5 (0%)    |
| MFIA GDVII                      | 0/5 (0%)   | 0/5 (0%)    |
| MFIA REO                        | 0/5 (0%)   | 0/5 (0%)    |
| MFIA EDIM<br>(ROTA)             | 0/5 (0%)   | 0/5 (0%)    |
| MFIA LCMV                       | 0/5 (0%)   | 0/5 (0%)    |
| MFIA ECTRO                      | 0/5 (0%)   | 0/5 (0%)    |
| MFIA MAV 1 & 2                  | 0/5 (0%)   | 0/5 (0%)    |
| MFIA MCMV                       | 0/5 (0%)   | 0/5 (0%)    |
| MFIA K                          | 0/5 (0%)   | 0/5 (0%)    |
| MFIA MTLV                       | 0/5 (0%)   | 0/5 (0%)    |
| MFIA POLY                       | 0/5 (0%)   | 0/5 (0%)    |
| MFIA HANT                       | 0/5 (0%)   | 0/5 (0%)    |
| MFIA MPUL                       | 0/5 (0%)   | 0/5 (0%)    |
| MFIA ECUN                       | 0/5 (0%)   | 0/5 (0%)    |
| MFIA CARB                       | 0/5 (0%)   | 0/5 (0%)    |
| MFIA PHV                        | 0/5 (0%)   | 0/5 (0%)    |
| MFIA LDV                        | 0/5 (0%)   | 0/5 (0%)    |
| MFIA Anti-Ig<br>(Positive Ctrl) | 5/5 (100%) | 5/5 (100%)  |

**Table S1. Rewilded Mice Are Seronegative for Common Mouse Pathogens, Related to STAR Methods.**

Multiplexed Fluorometric ImmunoAssay results from serum of lab (Lab) and rewilded (Wild) mice (Animal Health Diagnostic Services, MFIA Mouse Assessment Plus Profile, Charles River). N = 5 lab and 5 rewilded mice.

| <b>Infectious Disease</b>    | <b>Lab</b> | <b>Wild</b> |
|------------------------------|------------|-------------|
| LCMV                         | -          | 0/10 (0%)   |
| MAV 1 & 2                    | -          | 0/10 (0%)   |
| MHV                          | 0/5 (0%)   | 0/20 (0%)   |
| MNV                          | -          | 0/10 (0%)   |
| Mousepox (Ectromelia)        | -          | 0/10 (0%)   |
| Mouse Parvovirus (MPV/MVM) P | 0/5 (0%)   | 0/20 (0%)   |
| MRV (EDIM)                   | 0/5 (0%)   | 0/20 (0%)   |
| PVM                          | 0/5 (0%)   | 0/20 (0%)   |
| REO                          | -          | 0/10 (0%)   |
| SEND                         | 0/5 (0%)   | 0/20 (0%)   |
| TMEV/GDVII                   | 0/5 (0%)   | 0/20 (0%)   |
| Beta Strep Grp A             | 0/5 (0%)   | 0/20 (0%)   |
| Beta Strep Grp B             | 0/5 (0%)   | 0/20 (0%)   |
| Beta Strep Grp C             | 0/5 (0%)   | 0/20 (0%)   |
| Beta Strep Grp G             | 0/5 (0%)   | 0/20 (0%)   |
| B. bronchiseptica            | 0/5 (0%)   | 0/20 (0%)   |
| B. hinzii                    | -          | 0/10 (0%)   |
| Campylobacter Genus          | -          | 0/10 (0%)   |
| C. bovis                     | -          | 0/10 (0%)   |
| CAR Bacillus                 | -          | 0/10 (0%)   |
| C. kutscheri                 | 0/5 (0%)   | 0/20 (0%)   |
| C. piliforme                 | 0/5 (0%)   | 0/20 (0%)   |
| C. rodentium                 | 0/5 (0%)   | 0/20 (0%)   |
| K. oxytoca                   | 0/5 (0%)   | 4/20 (20%)  |
| K. pneumoniae                | 0/5 (0%)   | 0/20 (0%)   |
| Helicobacter genus           | -          | 0/10 (0%)   |
| M. pulmonis                  | 0/5 (0%)   | 0/20 (0%)   |
| P. pneumotropicaHeyl         | 0/5 (0%)   | 0/20 (0%)   |
| P. pneumotropicaJawetz       | 0/5 (0%)   | 0/20 (0%)   |
| Ps. aeruginosa               | 0/5 (0%)   | 0/20 (0%)   |
| Salmonella Genus             | 0/5 (0%)   | 0/20 (0%)   |
| S. aureus                    | 1/5 (20%)  | 19/20 (95%) |
| S. moniliformis              | 0/5 (0%)   | 0/20 (0%)   |
| S. pneumoniae                | -          | 0/10 (0%)   |
| Cryptosporidium              | -          | 0/10 (0%)   |
| Demodex                      | -          | 0/10 (0%)   |
| Entamoeba                    | 1/5 (20%)  | 3/20 (15%)  |
| Giardia                      | 0/5 (0%)   | 0/20 (0%)   |
| Mite                         | 0/5 (0%)   | 0/20 (0%)   |
| Pinworm                      | 0/5 (0%)   | 0/20 (0%)   |
| Pneumocystis                 | 0/5 (0%)   | 0/20 (0%)   |
| P. mirabilis                 | -          | 4/10 (40%)  |
| Spirochete muris             | 0/5 (0%)   | 0/20 (0%)   |
| Tritrichomonas genus         | -          | 0/10 (0%)   |

**Table S2. Rewilded Mice Are Negative for Most Agents Detected by PCR Screening, Related to STAR Methods.**

TaqMan PCR testing results from direct animal sampling of lab (Lab) and rewilded (Wild) mice (Animal Health Diagnostic Services, Surveillance Plus PRIA Panel, Charles River). N = 5 lab and 20 rewilded mice.

| Mouse/#                    | Repeats                    | Spa type | PVL | alpha | beta | delta/PSMs | Pigment |
|----------------------------|----------------------------|----------|-----|-------|------|------------|---------|
| Wild WT Colony #1          | Z1-D1-M1-D1-M1-N1-K1-B1    | 17/t216  | -   |       | +++  | +++        | normal  |
| Wild WT Colony #2          | Z1-D1-M1-D1-M1-N1-K1-B1    | 17/t216  | -   |       | +++  | +++        | normal  |
| Wild WT Colony #3          | U1-G1-F1-M1-E1-B1-B1-P1-B1 | 876/t786 | +   |       | +++  | +++        | normal  |
| Wild WT Colony #4          | U1-G1-F1-M1-E1-B1-B1-P1-B1 | 876/t786 | +   |       | +++  | +          | normal  |
| Wild Nod2 Colony #1        | Z1-D1-M1-D1-M1-N1-K1-B1    | 17/t216  | -   |       | +++  | +++        | normal  |
| Wild Nod2 Colony #2        | Z1-D1-M1-D1-M1-N1-K1-B1    | 17/t216  | -   |       | +++  | +++        | normal  |
| Wild Nod2 Colony #3        | U1-G1-F1-M1-E1-B1-B1-P1-B1 | 876/t786 | +   |       | +++  | +          | normal  |
| Wild Nod2 Colony #4        | U1-G1-F1-M1-E1-B1-B1-P1-B1 | 876/t786 | +   |       | +++  | +          | normal  |
| Wild Atg16L1 A/A Colony #1 | U1-G1-F1-M1-E1-B1-B1-P1-B1 | 876/t786 | +   |       | +++  | +          | normal  |
| Wild Atg16L1 A/A Colony #2 | U1-G1-F1-M1-E1-B1-B1-P1-B1 | 876/t786 | +   |       | +++  | +          | normal  |
| Wild Atg16L1 A/A Colony #3 | U1-G1-F1-M1-E1-B1-B1-P1-B1 | 876/t786 | +   |       | +++  | +          | normal  |
| Wild Atg16L1 A/A Colony #4 | U1-G1-F1-M1-E1-B1-B1-P1-B1 | 876/t786 | +   |       | +++  | +          | normal  |
| Wild Atg16L1 A/A Colony #5 | U1-G1-F1-M1-E1-B1-B1-P1-B1 | 876/t786 | +   |       | +++  | +          | normal  |
| Wild Atg16L1 A/A Colony #6 | U1-G1-F1-M1-E1-B1-B1-P1-B1 | 876/t786 | +   |       | +++  | +          | normal  |
| Wild Atg16L1 A/A Colony #7 | U1-G1-F1-M1-E1-B1-B1-P1-B1 | 876/t786 | +   |       | +++  | +          | normal  |
| Wild Atg16L1 A/A Colony #8 | U1-G1-F1-M1-E1-B1-B1-P1-B1 | 876/t786 | +   |       | +++  | +          | normal  |
| Lab Atg16L1 A/A Colony #1  | U1-G1-F1-M1-E1-B1-B1-P1-B1 | 876/t786 | +   |       | +++  | +          | normal  |
| Lab Atg16L1 A/A Colony #2  | U1-G1-F1-M1-E1-B1-B1-P1-B1 | 876/t786 | +   |       | +++  | +          | normal  |
| Lab Atg16L1 A/A Colony #3  | U1-G1-F1-M1-E1-B1-B1-P1-B1 | 876/t786 | +   |       | +++  | +          | normal  |
| Lab Atg16L1 A/A Colony #4  | U1-G1-F1-M1-E1-B1-B1-P1-B1 | 876/t786 | +   |       | +++  | +          | normal  |

**Table S3. Staphylococcus Aureus Isolates Identified from Stool of Rewilded Mice, Related to STAR Methods.**

Genotyping of *S. aureus* isolates from representative lab and rewilded mice by DNA sequence analysis of the protein A gene variable repeat region (spa typing) and a variety of additional DNA polymorphisms including the presence of pvl genes.
